# Supplementary material
Source: PubMed Central journal article supplement (PMC3632354)

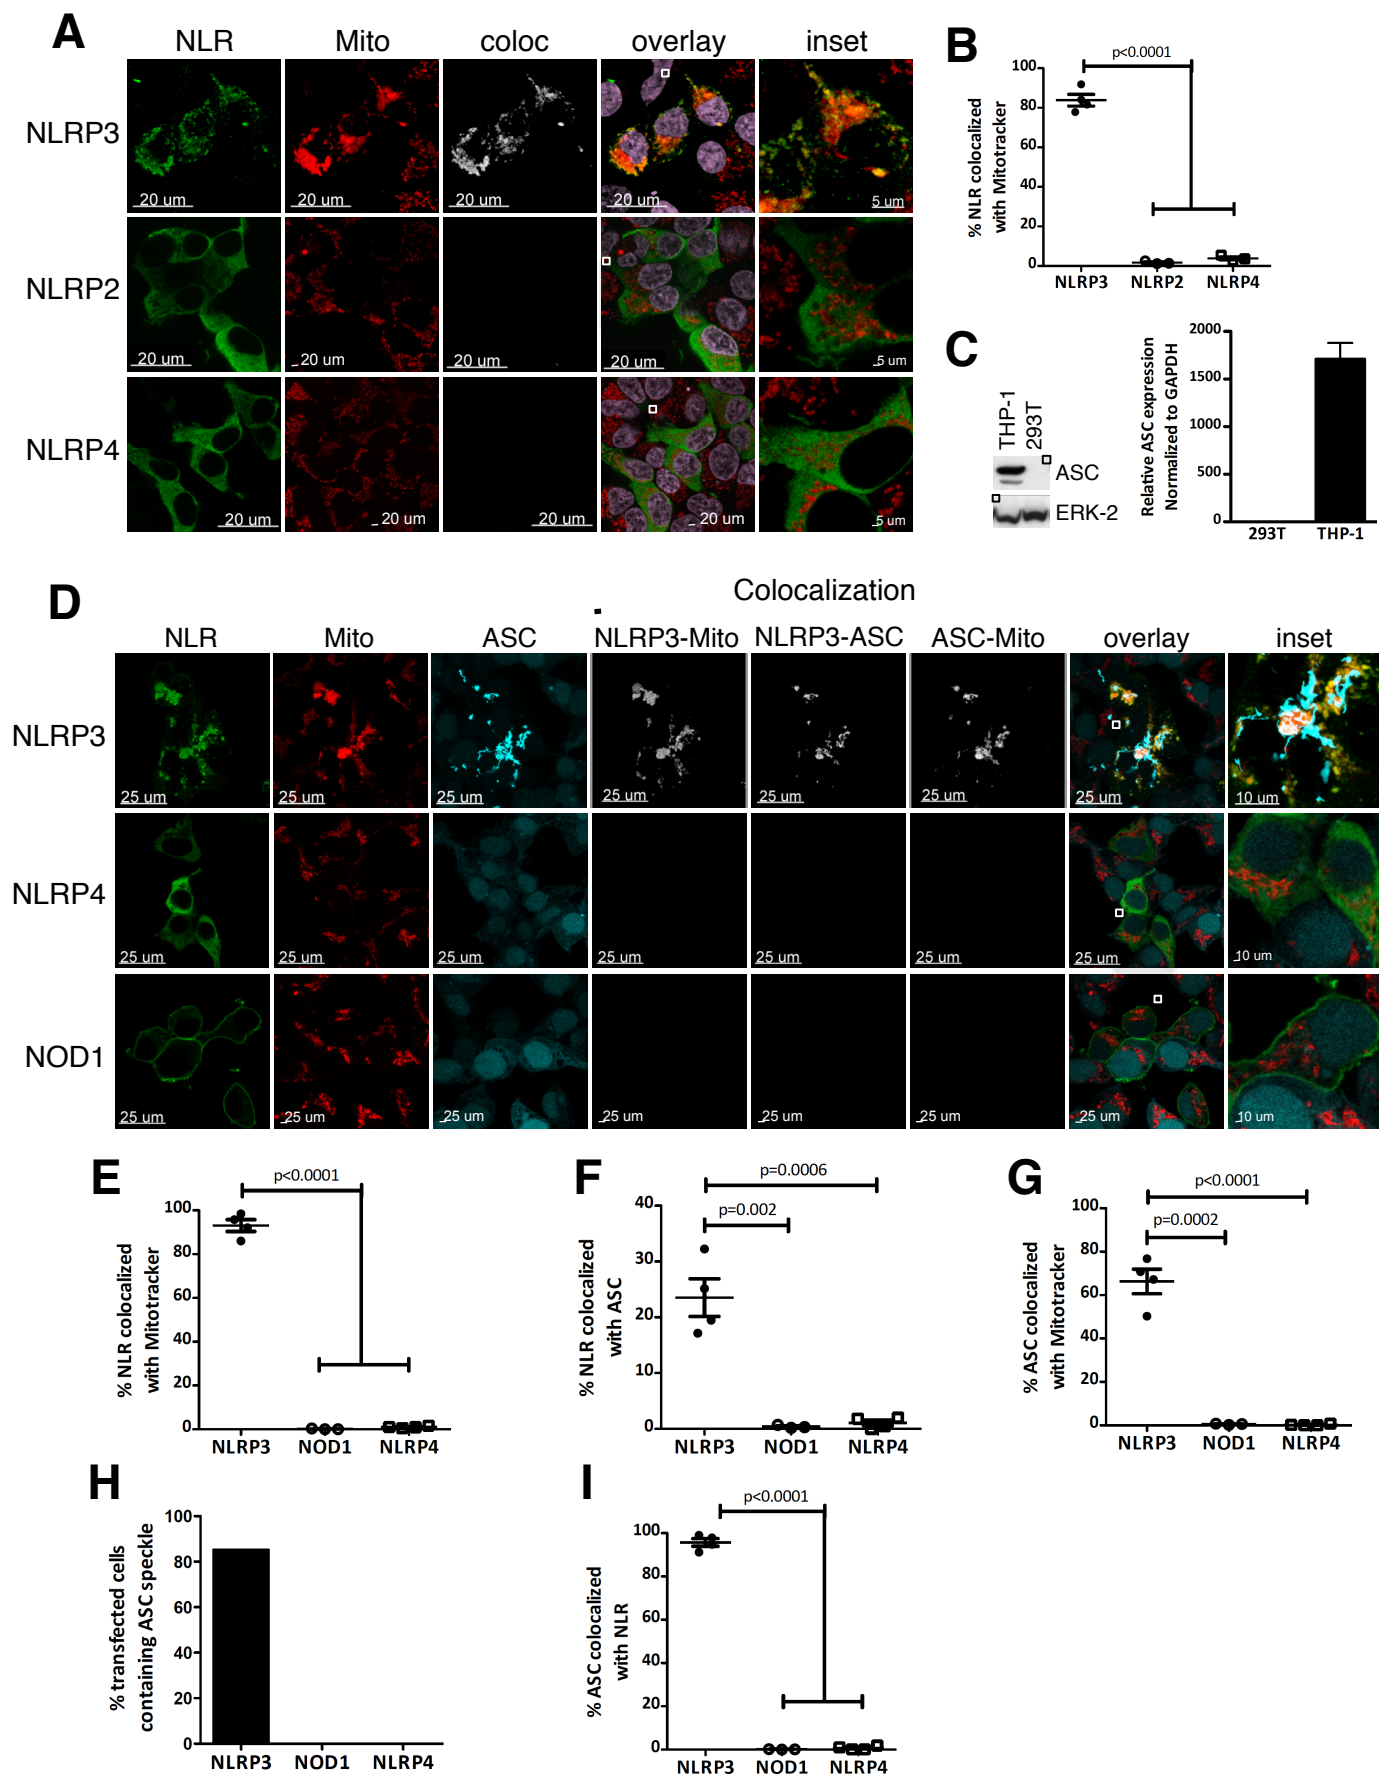

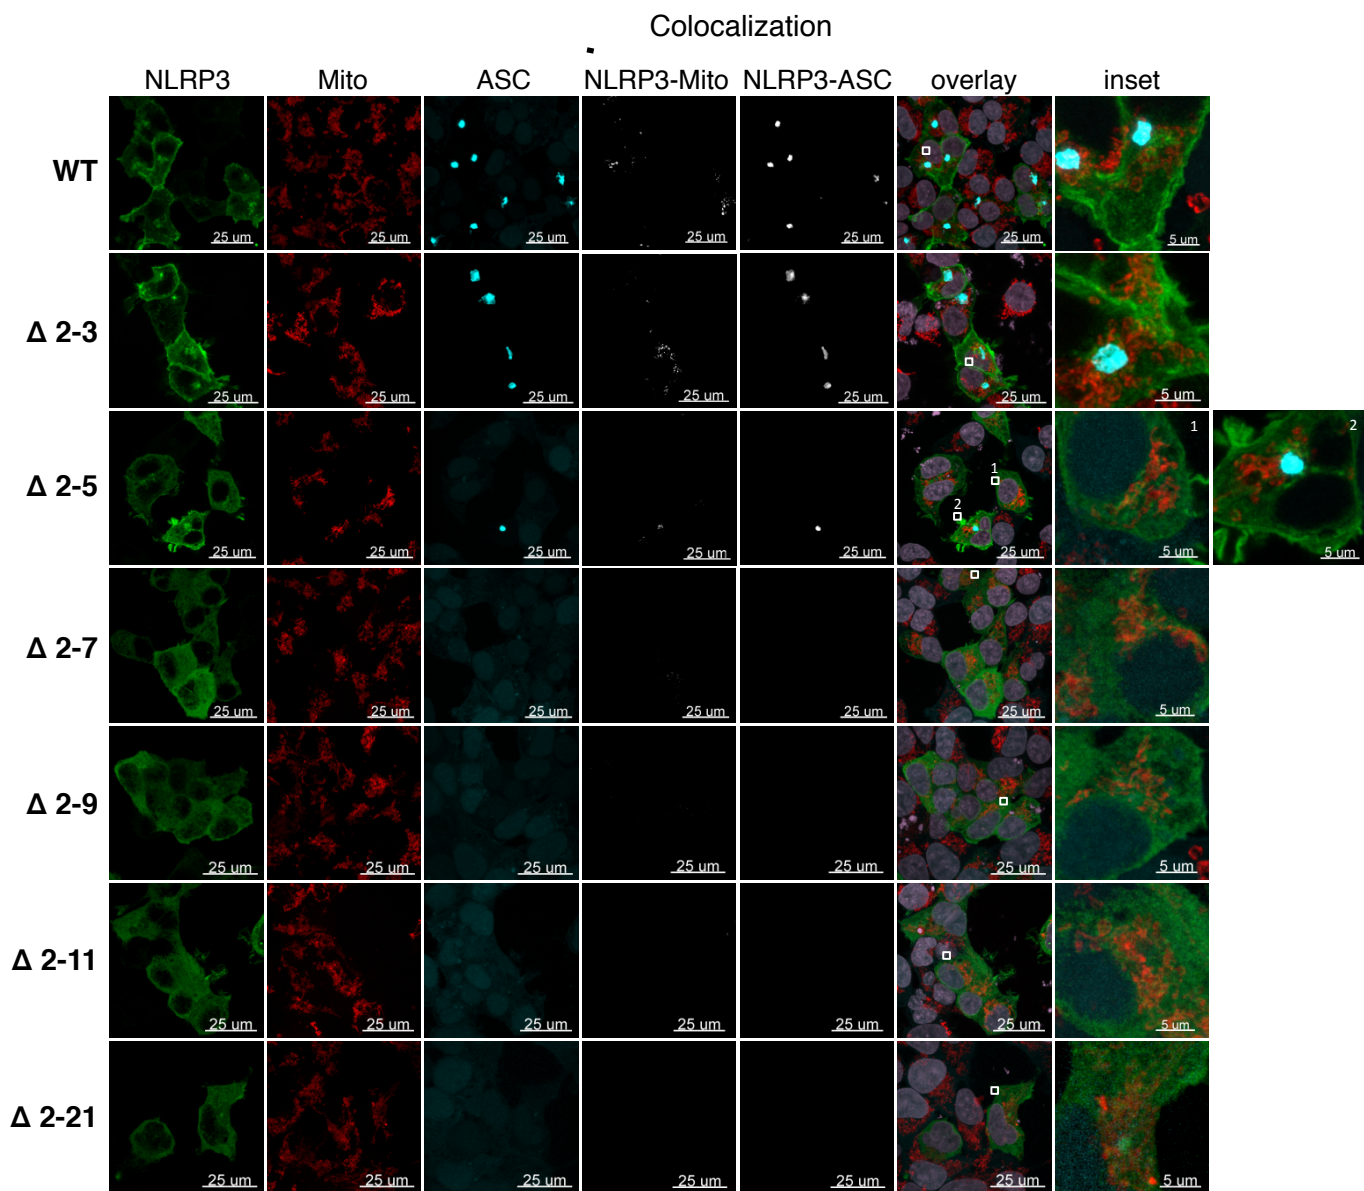

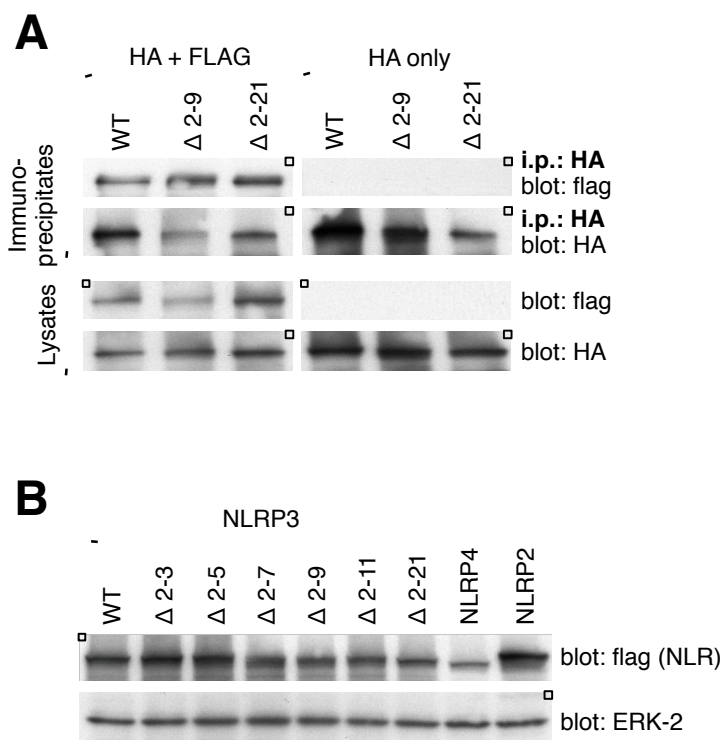

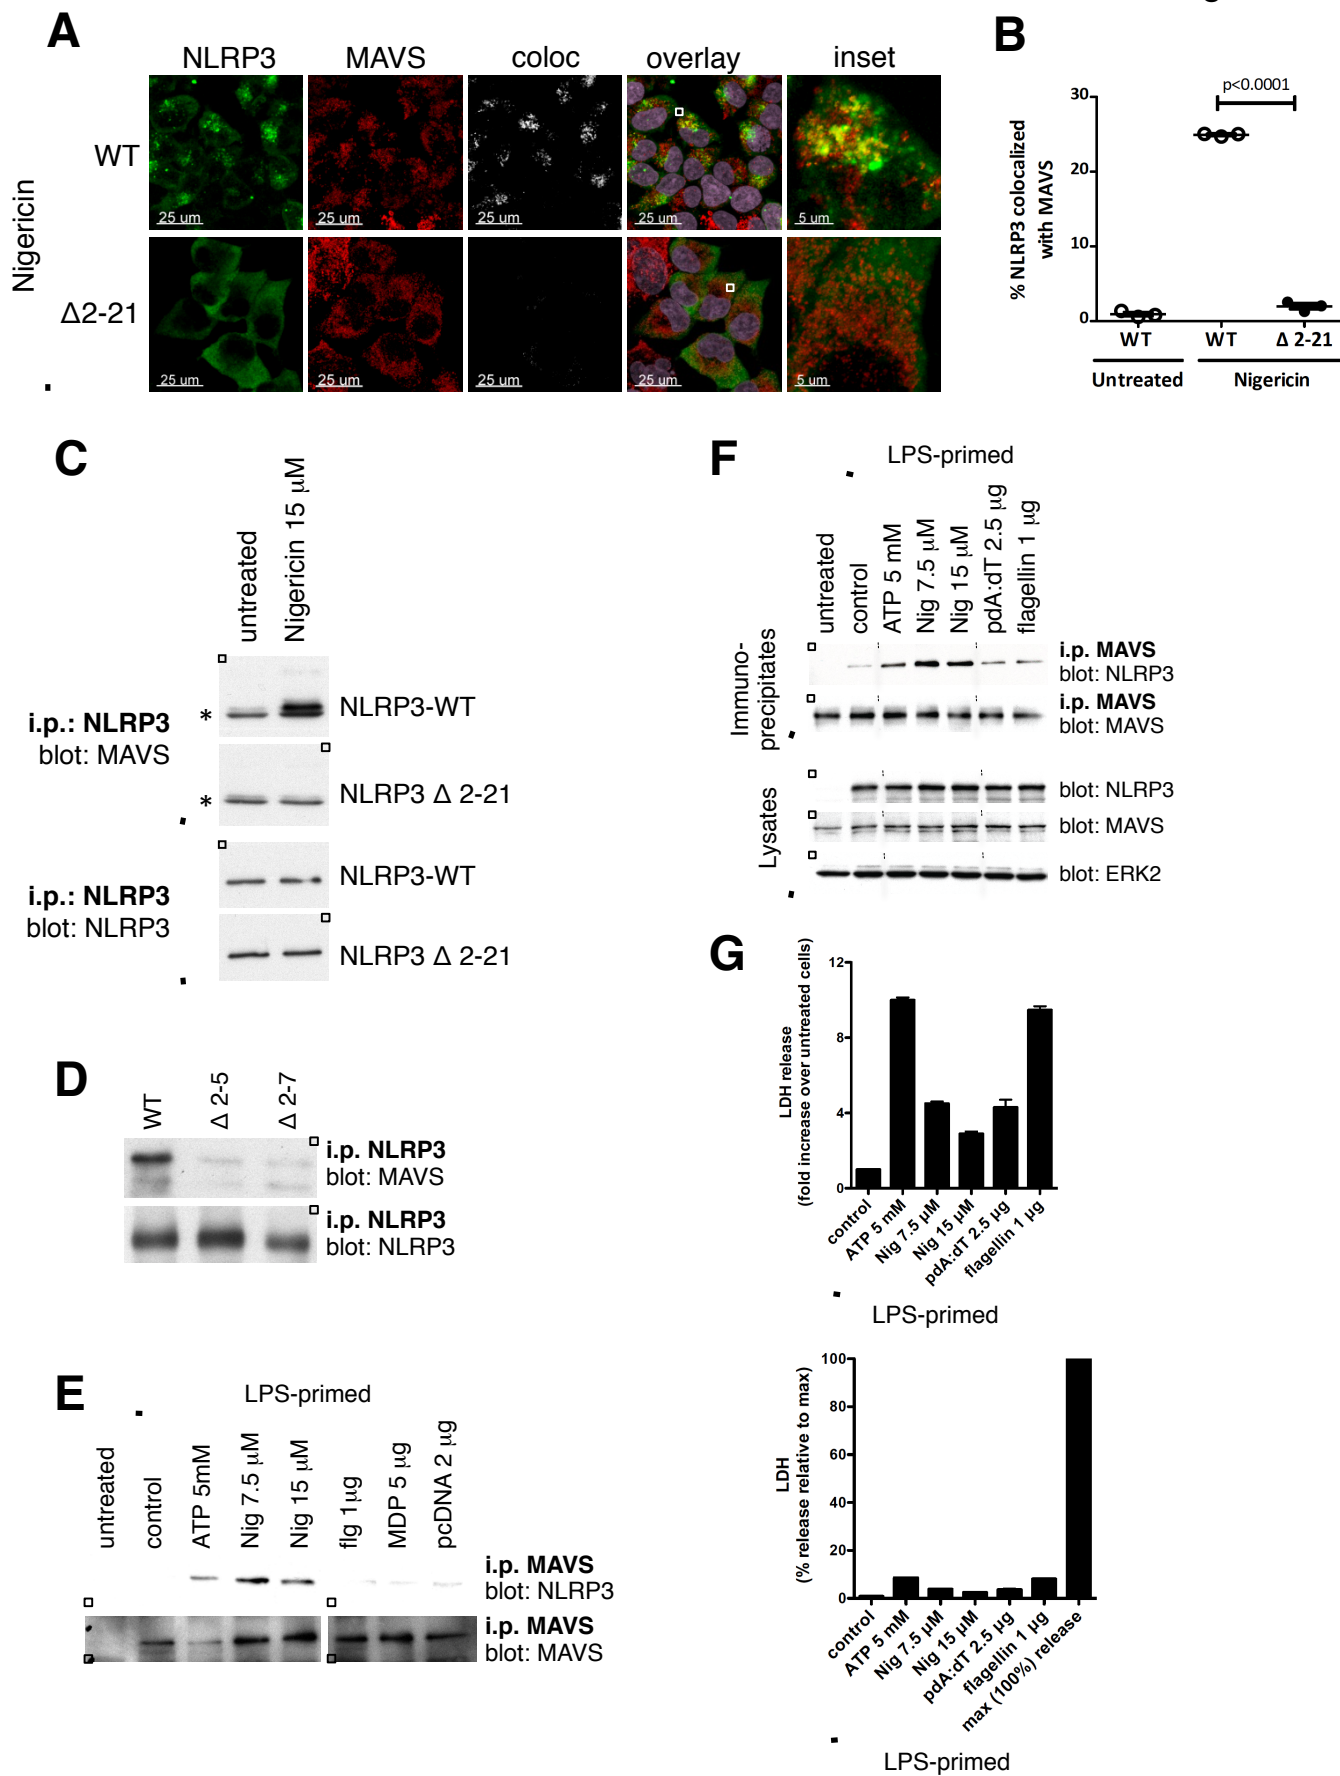

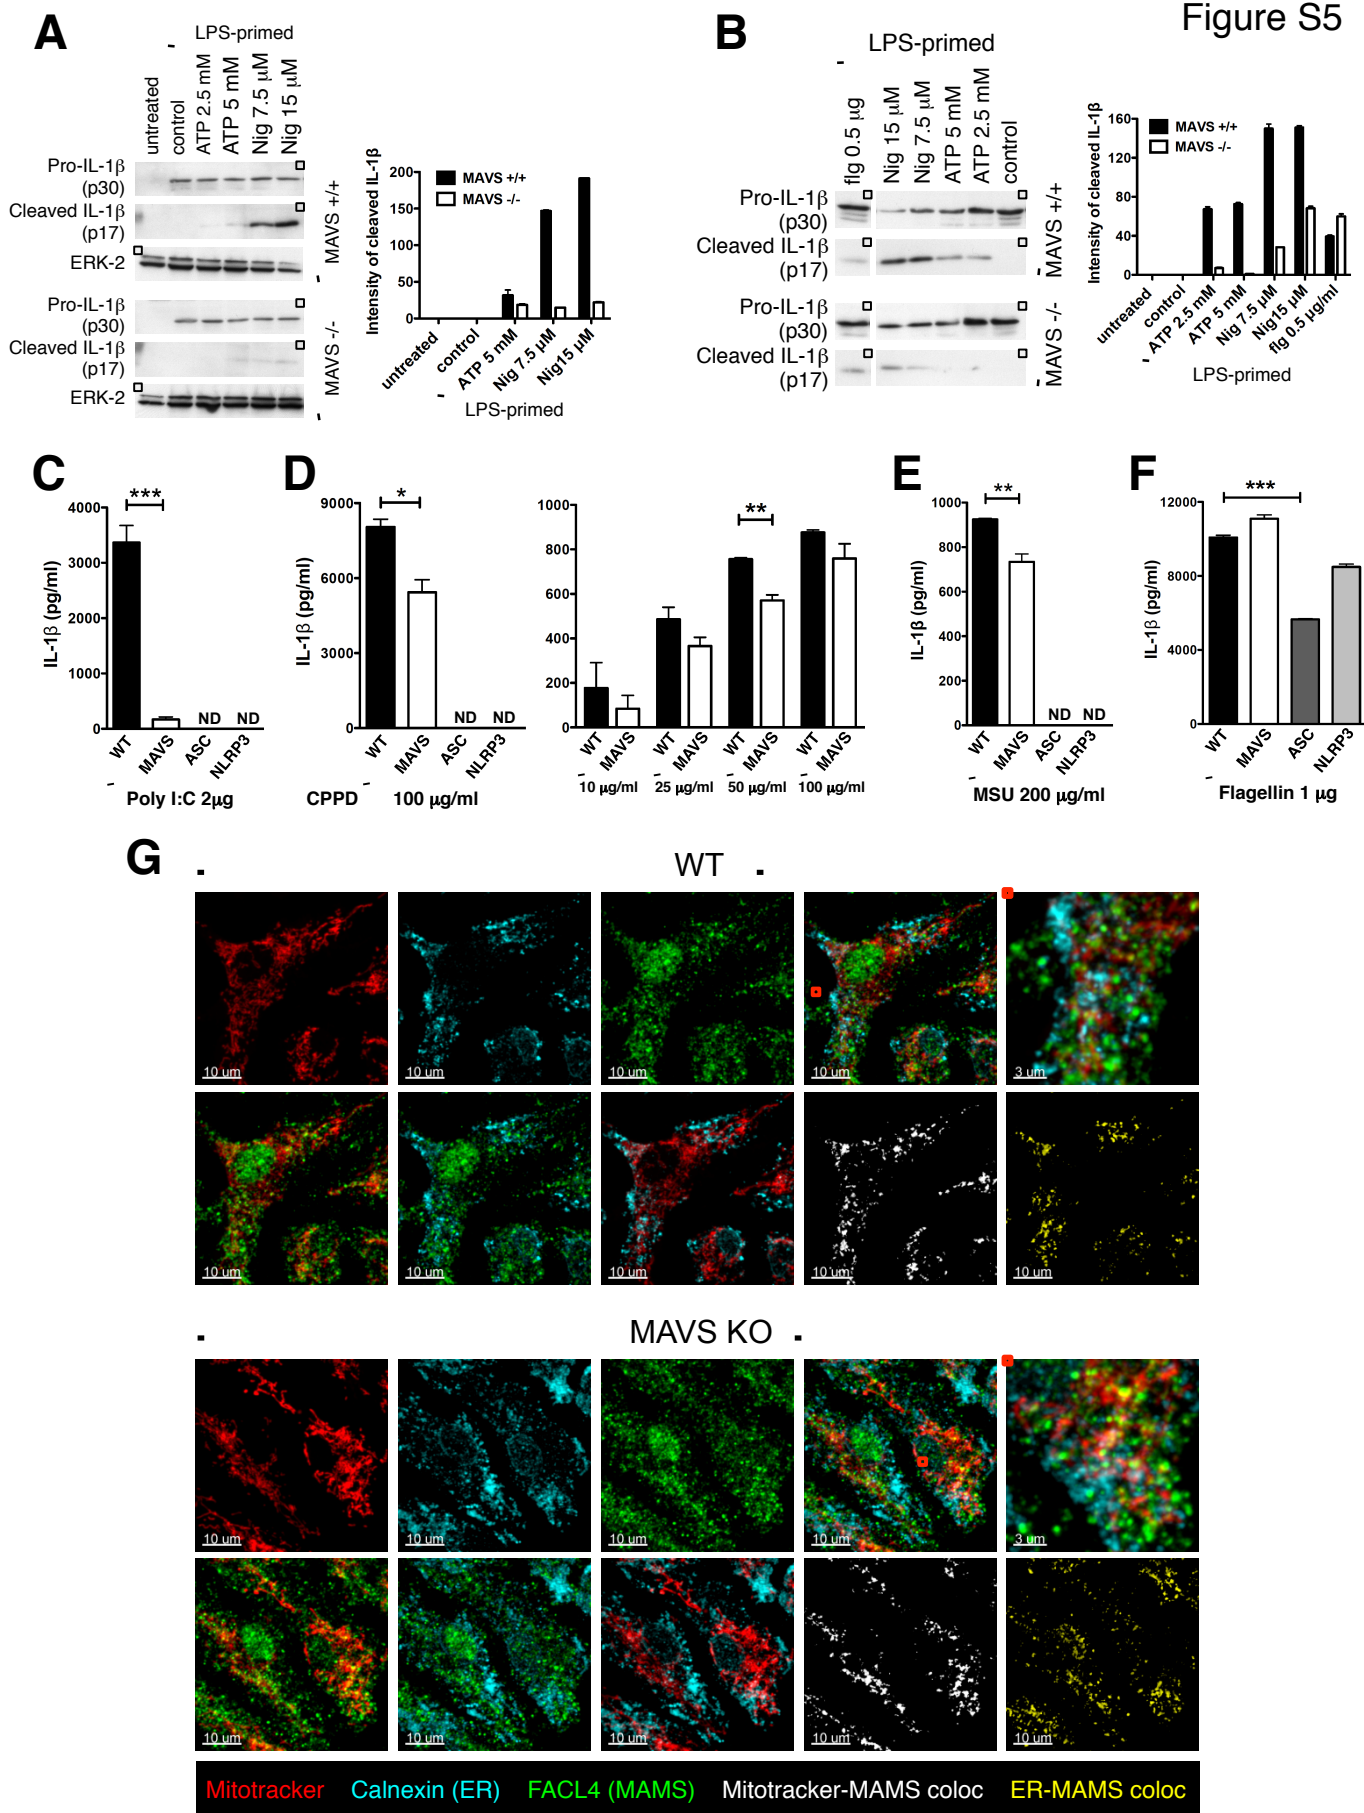

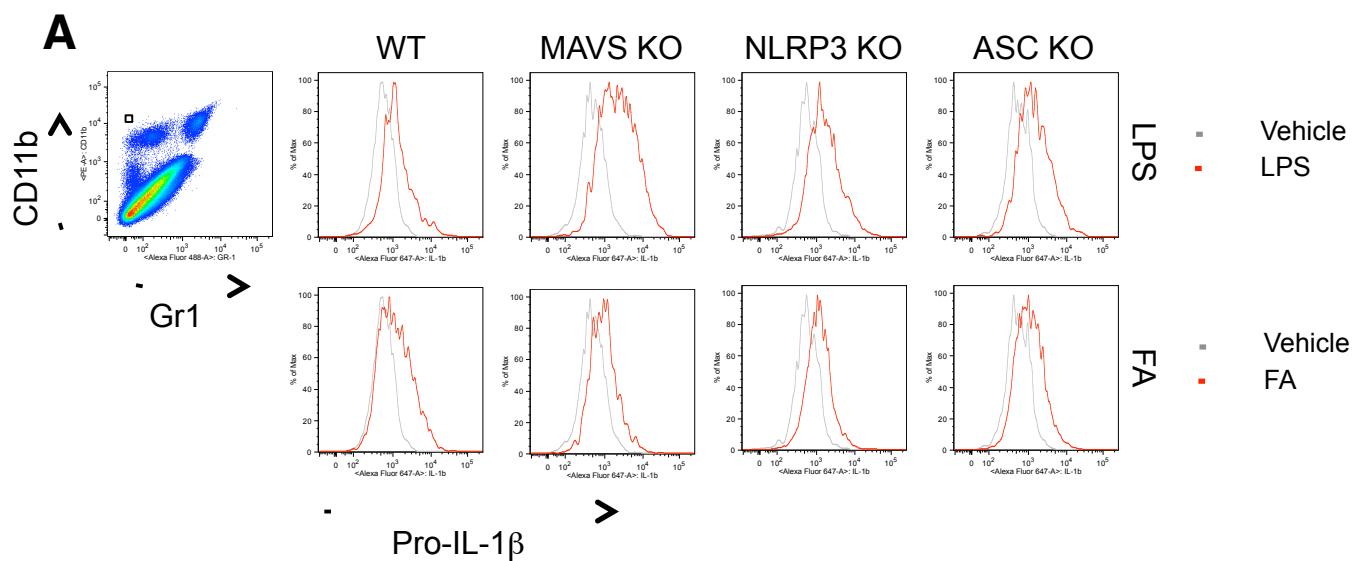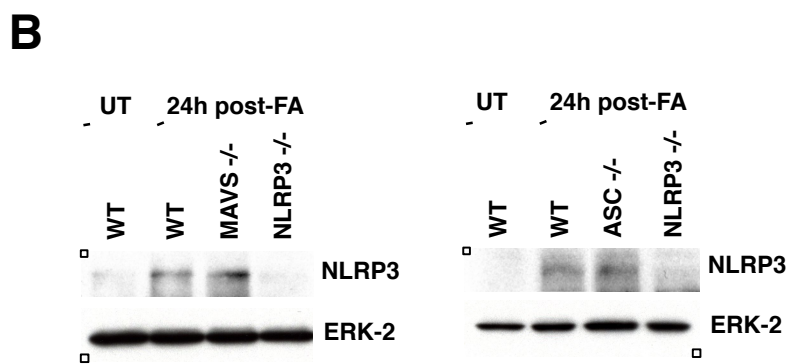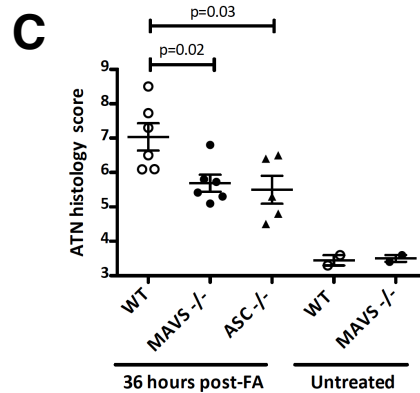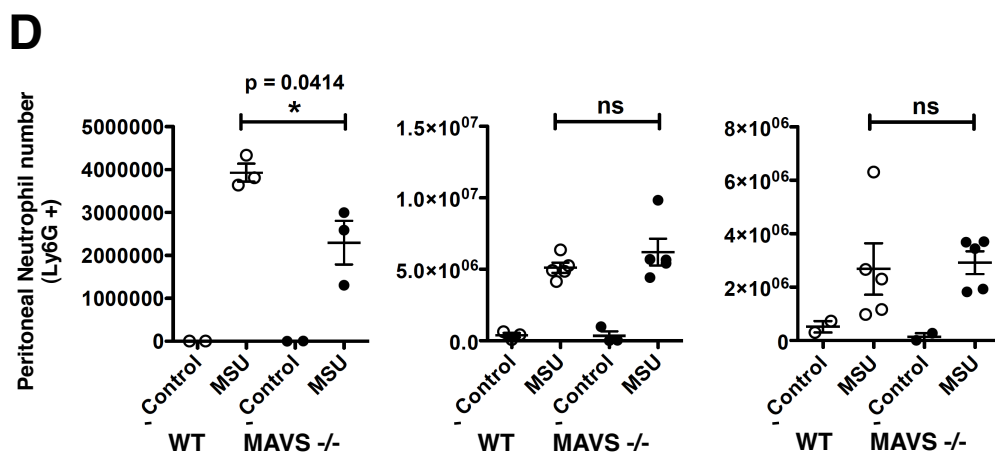

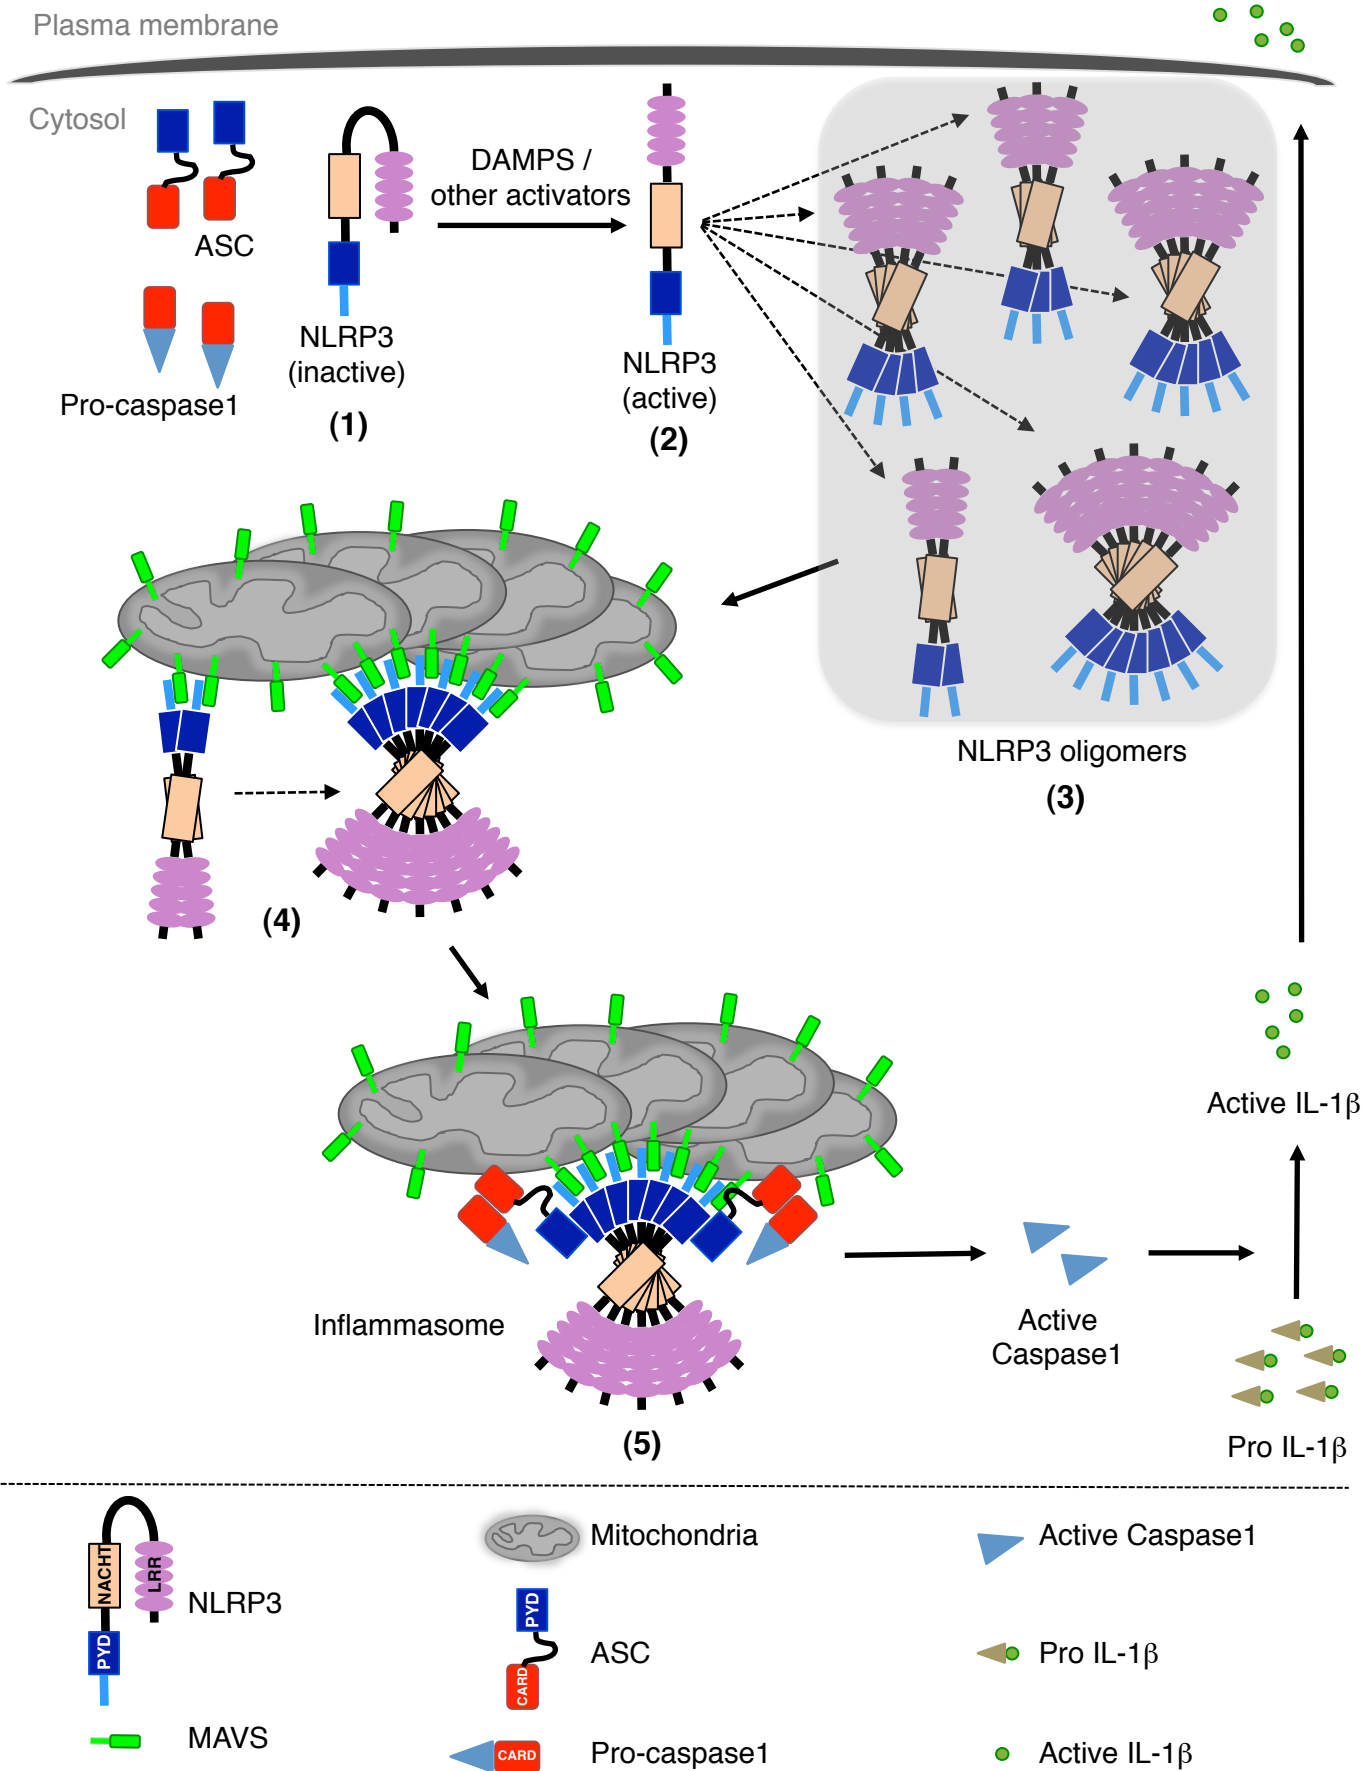

Supplement: NIHMS454353-supplement-02.pdf [file NIHMS454353-supplement-02.pdf]
